# Supplementary material for: Overcoming Common Pitfalls to Improve the Accuracy of Crop Residue Burning Measurement Based on Remote Sensing Data
Source: MDPI journal article supplement (doi:10.3390/rs16020342), 2024-01-15
Supplement: s1 [file s1]

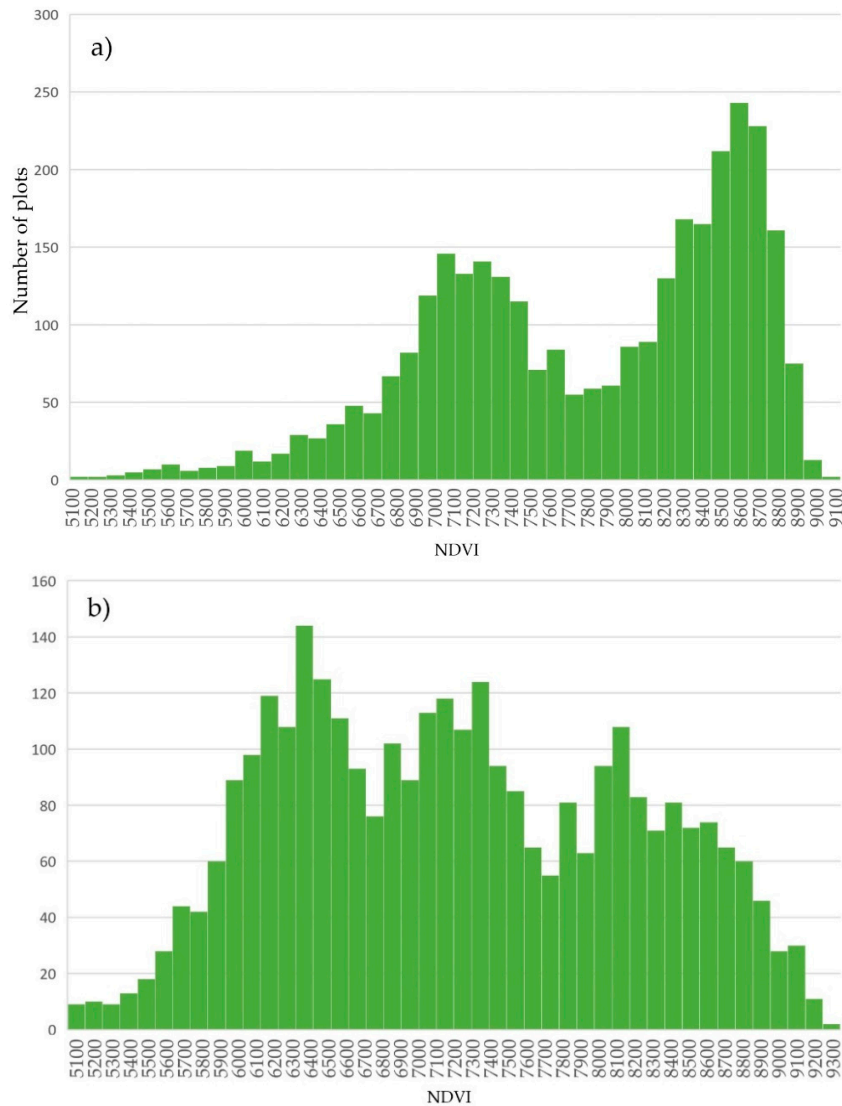

**Figure S1.** Median NDVI of 3168 rice plots visited on ground prior to burn season from Sentinel-2 observation on (a) 21-Aug-2019 and (b) 05-Sept-2019. These fields are assumed to be in production at this time, thus NDVI could be used to filter rice fields from other land use. However, the spread is wide. Even with a cutoff of 0.60 for masking fields, 100 fields (3%) are excluded from the analysis.

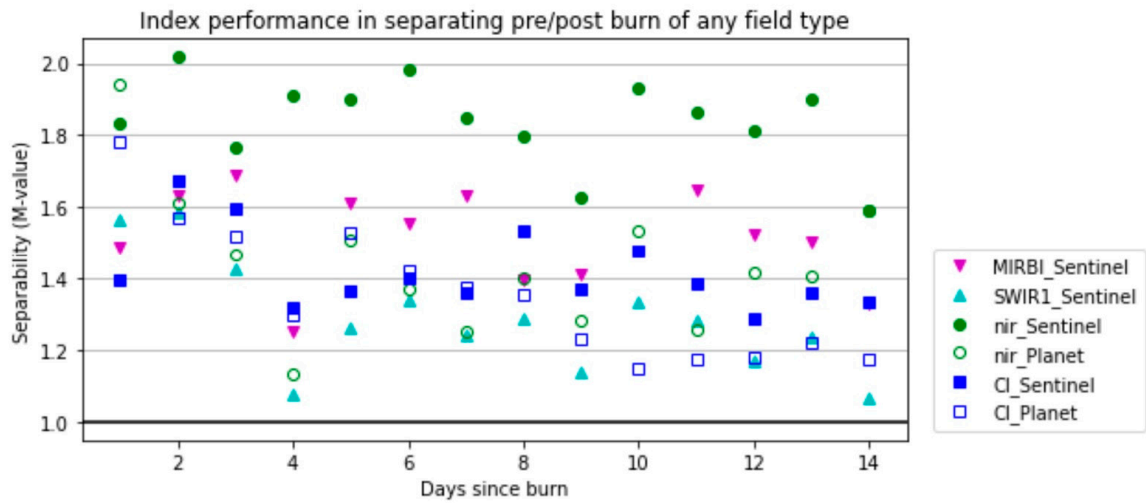

**Figure S2.** Index performance in separating pre- and post-burned fields with increasing time from the burn event. Indices showing the best separability, based on the parametric M-statistic, are shown here. Separability is considered to be good if the M-statistic is above one and excellent around two.

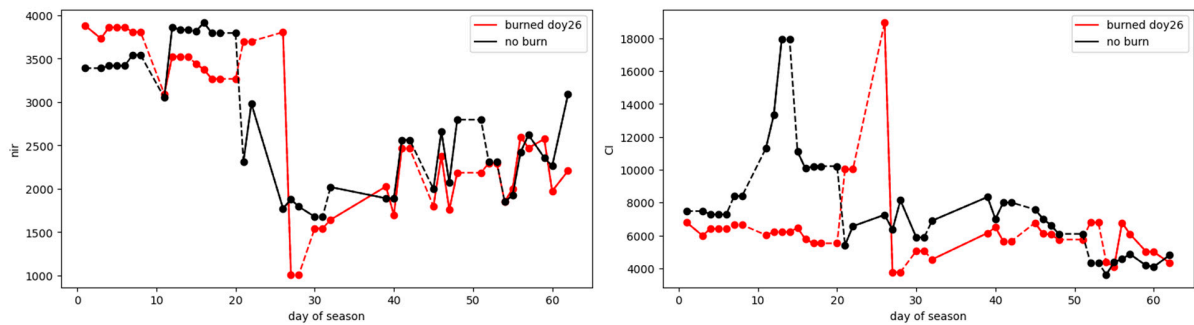

**Figure S3.** (a) NIR band and (b) char index (CI) signatures across the burn season (day of season 0 = 10-Oct-2019) for a pixel burned on day 26 (red) and a pixel not burned in the season (black). Dashed lines indicate that subsequent observations are more than one day apart. These represent ideal cases where image differencing is able to separate the burn signal because there is a clear pre and post burn observation with a single day separation. This may not be the case for a large portion of the data. Prior to developing a custom model of CRB, a signal-to-noise analysis with a time-series tool like the one used here is recommended to home in on the targeted signal and determine whether it will be detectable for high enough percentage of burned plots given noise in the imagery and likely missed observations.

**Table S1.** Articles processed in quantitative literature review on remote sensing of crop residue burning

| article | article year | location | focus <sup>1</sup> | period  | crop type      | MODIS<br>_BA | MODIS<br>_AF | VIIRS<br>_AF | other<br>sensors   | validation <sup>2</sup> |
|---------|--------------|----------|--------------------|---------|----------------|--------------|--------------|--------------|--------------------|-------------------------|
| [1]     | 2016         | India    | 6                  | 2002-12 | rice,<br>wheat |              | 1            |              | MODIS EVI          |                         |
| [2]     | 2022         | Romania  | 8                  | 2015    |                |              | 1            |              | atm CALIOP<br>/OMI | gbem                    |
| [3]     | 2006         | India    | 1,6                | 2005    | rice,<br>wheat |              |              |              | AWiFS              |                         |

|         |      |          |     |         |             |   |   |                   |                                                                                     |
|---------|------|----------|-----|---------|-------------|---|---|-------------------|-------------------------------------------------------------------------------------|
| [4]     | 2009 | India    | 6   | 2007    |             | 1 |   | atm CALIOP        | gbem                                                                                |
| [5]     | 2009 | Arabian  | 5   | 2007    | all         |   | 1 |                   |                                                                                     |
| [6]     | 2021 | China    | 8   | 2013-20 | all         | 1 |   |                   |                                                                                     |
| [7]     | 2020 | India    | 6   | 2008    |             |   |   | atm               |                                                                                     |
| [8]     | 2022 |          | 6   | -       |             |   |   | atm               |                                                                                     |
| [9]     | 2023 | India    | 6   | 2006-22 | All         |   | 1 |                   |                                                                                     |
| [10]    | 2019 | India    | 6   | 2016-17 | rice, wheat | 1 |   |                   |                                                                                     |
| [11]    | 2019 | India    | 4   | 2013-14 | rice        |   | 1 |                   | none                                                                                |
| [12]    | 2010 | SE Asia  | 6   | 2000-06 | All         | 1 |   | L3JRC             |                                                                                     |
| [13]    | 2013 | Taiwan   | 1   | 2009    | rice        |   |   | Formosat-2        | 116 ground plots                                                                    |
| [14]    | 2017 | India    | 6   | 2017    |             |   |   | atm column        |                                                                                     |
| [15]    | 2022 | India    | 5   | -       |             |   |   | atm column        |                                                                                     |
| [16]    | 2020 | India    | 1   | 2014-18 | rice        |   |   | Landsat 8         | 50 "ground truth points" (no elaboration)                                           |
| [17]    | 2019 | China    | 3   | 2018    | all         |   | 1 | 1                 |                                                                                     |
| [18]    | 2020 | China    | 1   | 2014-15 |             | 1 | 1 |                   | GF-1 images (16m)                                                                   |
| [19]    | 2022 | China    | 1,7 | 2018-19 | all         |   | 1 | 1                 | Himawari-8                                                                          |
| [20]    | 2010 | India    | 5   | 2016    |             |   | 1 |                   | PlanetScope                                                                         |
| [21]    | 2021 | India    | 1   | 2019    | rice        |   |   | Sentinel-2        | visual inspection (mention "ground truth", no elaboration)                          |
| [22]    | 1996 | UK       | 1   | 1995    |             |   |   | AVHRR             |                                                                                     |
| [23]    | 2023 | India    | 1,6 | 2021    | rice        | 1 |   |                   |                                                                                     |
| [24,25] | 2022 | India    | 1   | 2019-21 | wheat       |   |   | Sentinel-2        | PlanetScope                                                                         |
| [26]    | 2008 | China    | 1   | 2006    |             | 1 |   |                   |                                                                                     |
| [27]    | 2021 | China    | 6   | 2003-19 | all         |   | 1 |                   |                                                                                     |
| [28]    | 2010 | China    | 5   | 2007    |             |   | 1 |                   |                                                                                     |
| [29]    | 2016 | Russia   | 1   | 2013    | wheat, all  | 1 | 1 | custom BA         | digitized pixels in VHR images (burn, plow, residue, bare), >2000 train + 2000 test |
| [30]    | 2021 | Ukraine  | 1,7 | 2016-17 | all         |   |   | 1                 | digitized samples from Planet, Sentinel-2 and Landsat                               |
| [31]    | 2021 | Ukraine  | 1,7 | 2016-17 | wheat, corn | 1 |   | Fire CCI          | digitized samples from Landsat, Sentinel-2, PlanetScope                             |
| [32]    | 2009 | Ukraine  | 1   | 2002-08 |             |   | 1 |                   |                                                                                     |
| [33]    | 2020 | China    | 3   | 2013-15 | rice        |   | 1 |                   |                                                                                     |
| [34]    | 2023 | China    | 8   | -       | all         |   |   | local             |                                                                                     |
| [35]    | 2023 | China    | 6   | 2016-20 | all         |   |   | Himawari-8        |                                                                                     |
| [36]    | 2019 | China    | 9   | -       | corn        |   |   |                   |                                                                                     |
| [37]    | 2015 | Pakistan | 6   | 2016-17 | all         |   |   |                   |                                                                                     |
| [38]    | 2018 | India    | 4,6 | 2013-16 | rice        |   | 1 | atm (CALIOP, OMI) | gbem                                                                                |

|      |      |          |       |         |             |   |   |   |            |                                                |
|------|------|----------|-------|---------|-------------|---|---|---|------------|------------------------------------------------|
| [39] | 2019 | India    | 4     | 2002-16 | rice, wheat |   | 1 |   | MODIS-NDVI |                                                |
| [40] | 2022 | India    | 7,8   | 2017-21 | rice, wheat |   | 1 | 1 |            | predicted vs. observed fires in VIIRS          |
| [41] | 2019 | India    | 1     | 2017    | rice        |   |   |   | Landsat-8  |                                                |
| [42] | 2018 | China    | 6     | 2000-14 | all         |   | 1 |   |            |                                                |
| [43] | 2018 | Thailand | 6     | 2018    | rice        | 1 |   |   |            |                                                |
| [44] | 2020 | China    | 2,3   | 2006-17 | all         |   | 1 |   |            |                                                |
| [45] | 2022 | India    | 3     | 2002-20 | rice, wheat |   | 1 |   |            |                                                |
| [46] | 2020 | India    | 5     | -       |             |   |   |   |            |                                                |
| [47] | 2014 | India    | 5     | 2012    | all         |   | 1 |   |            |                                                |
| [48] | 2022 | India    | 5     | 2020    | all         |   |   | 1 |            |                                                |
| [49] | 2012 | India    | 6     | 2008    | all         |   | 1 |   |            |                                                |
| [50] | 2022 | India    | 1     | 2002-22 |             |   | 1 |   |            |                                                |
| [51] | 2021 | India    | 6     | 2017    | rice        |   |   | 1 |            |                                                |
| [52] | 2019 | India    | 2     | 2001-18 |             | 1 | 1 |   |            |                                                |
| [53] | 2020 | India    | 5     | 2018    | all         |   | 1 |   |            |                                                |
| [54] | 2021 | India    | 6     | 2007-20 | all         |   | 1 |   |            |                                                |
| [55] | 2017 | Vietnam  | 6     | 2015    | rice        |   |   |   | Sentinel-1 |                                                |
| [56] | 2018 | Vietnam  | 6     | 2012-16 |             |   | 1 |   |            |                                                |
| [57] | 2020 | Vietnam  | 6     | 2015-17 | rice        |   |   |   | Sentinel-1 |                                                |
| [58] | 2022 | Vietnam  | 1,2   | 2020    |             |   |   |   | Sentinel-1 |                                                |
| [59] | 2021 | China    | 5     | 2015    | all         |   | 1 |   |            |                                                |
| [60] | 2016 | China    | 6     | 2012    | rice        | 1 |   |   |            |                                                |
| [61] | 2022 | China    | 6     | 2012-20 | all         |   |   | 1 |            |                                                |
| [62] | 2019 | India    | 8     | 2016    | rice        | 1 |   |   | Landsat    | household surveys (pts per village, not field) |
| [63] | 2013 | Taiwan   | 1     | 2008-09 | rice        |   |   |   | FORMOSAT-2 |                                                |
| [64] | 2015 | China    | 1     | 2013-14 | wheat       |   | 1 |   |            |                                                |
| [65] | 2020 | India    | 1     | 2003-18 | rice        |   | 1 | 1 |            | household surveys                              |
| [66] | 2020 | China    | 4     | 2013-15 | rice        |   | 1 |   |            |                                                |
| [67] | 2022 | India    | 2     | 2003-19 | rice        |   | 1 |   |            |                                                |
| [68] | 2018 | China    | 5     | 2006-14 | wheat       |   | 1 |   |            |                                                |
| [69] | 2022 | India    | 1,5,6 | 2018-21 |             | 1 |   |   |            |                                                |
| [70] | 2007 | USA      | 1     | 2004    |             |   | 1 |   |            |                                                |
| [71] | 2008 | USA      | 1     | 2003-06 | rice, wheat |   |   |   | MODIS-dNBR | 29 plowed fields (training); Aster (30m)       |
| [72] | 2012 | Russia   | 1     | 2008-09 |             | 1 | 1 |   |            |                                                |
| [73] | 2020 | China    | 5     | 2014-19 |             |   | 1 |   |            |                                                |
| [74] | 2022 | India    | 1     | 2012-20 |             |   |   | 1 |            |                                                |
| [75] | 2023 | China    | 3     | 2001-16 |             |   |   |   | MODIS      |                                                |
| [76] | 2022 | USA      | 6     | 2012-18 | sugar       |   |   |   | particle   |                                                |
| [77] | 2021 | Malawi   | 5     | 2004-16 |             |   |   |   | atm column |                                                |
| [78] | 2022 | India    | 1,4   | 2019    |             |   |   | 1 | FRP        |                                                |

|       |      |           |       |         |             |   |   |   |                       |                                                 |
|-------|------|-----------|-------|---------|-------------|---|---|---|-----------------------|-------------------------------------------------|
| [79]  | 2022 | Brazil    | 1,2,3 | 2008-12 | sugar       |   |   |   | Landsat               |                                                 |
| [80]  | 2017 | USA       | 1,4   | 2014    |             |   | 1 | 1 | GOES                  |                                                 |
| [81]  | 2020 | India     | 4     | 2017-18 |             |   |   |   | atm column            |                                                 |
| [82]  | 2002 | India     | 2,4   | 1987-98 |             |   |   |   |                       | DMSp-OLS (nighttime satellite)                  |
| [83]  | 2008 | India     | 1     | 2005    |             |   | 1 |   | AWiFS                 |                                                 |
| [84]  | 2021 | Iraq      | 1     | 2001-19 | 1           |   |   |   |                       |                                                 |
| [85]  | 2022 | India     | 4,5   | 2016-19 |             |   |   |   | atm column            |                                                 |
| [86]  | 2019 | Mexico    | 1     | 2003-14 | all         |   | 1 |   |                       |                                                 |
| [87]  | 2020 | China     | 1     | 2015    |             |   | 1 |   |                       |                                                 |
| [88]  | 2021 | India     | 1     | 2018    | all         |   | 1 |   |                       |                                                 |
| [89]  | 2013 | India     | 2,4   | 2012    |             |   | 1 |   |                       |                                                 |
| [90]  | 2018 | India     | 2,4   | 2003-17 |             |   | 1 |   |                       |                                                 |
| [91]  | 2022 | Pakistan  | 2,4   | 2007-15 |             |   |   |   | atm column            |                                                 |
| [92]  | 2019 | India     | 1, 2  | 2003-17 |             |   | 1 |   |                       |                                                 |
| [93]  | 2014 | China     | 1, 2  | 2014-16 |             |   | 1 |   |                       |                                                 |
| [94]  | 2021 | China     | 5     | 2001-17 | 1           |   |   |   |                       |                                                 |
| [95]  | 2021 | China     | 4,5   | 2016-17 |             |   | 1 |   |                       |                                                 |
| [96]  | 2021 | China     | 1     | 2001-17 | all         | 1 | 1 |   |                       |                                                 |
| [97]  | 2015 | NE Asia   | 1,7   | 2000-13 | all         | 1 | 1 |   |                       |                                                 |
| [98]  | 2011 | India     | 1     | 2006-09 |             |   | 1 |   |                       |                                                 |
| [99]  | 2020 | India     | 1     | 2018    | rice        |   |   |   | Sentinel-2(dNBR)      | "160 ground truth samples" (no elaboration)     |
| [100] | 2020 | India     | 1,4   | 2017-18 |             |   |   | 1 |                       |                                                 |
| [101] | 2021 | India     | 2     | 2017-19 |             |   |   | 1 |                       |                                                 |
| [102] | 2021 | India     | 2,3   | 2001-18 |             |   | 1 |   |                       | Sentinel images (trained with some ground info) |
| [103] | 2007 | Australia | 1     | 2005    |             | 1 |   |   |                       |                                                 |
| [104] | 2016 | China     | 6     | 2005-12 | wheat       |   |   |   |                       | sensitivity analysis                            |
| [105] | 2021 | China     | 4,5   | 2007-19 |             |   |   |   | atm column            |                                                 |
| [106] | 2022 | China     | 2,3   | 2003-18 |             |   | 1 |   |                       |                                                 |
| [107] | 2015 | Pakistan  | 5     | 2010    |             |   |   |   | atm column            |                                                 |
| [108] | 2016 | Pakistan  | 5     | 2013    |             |   |   |   | atm column            |                                                 |
| [109] | 2020 | India     | 1     | 2014    |             |   | 1 | 1 |                       |                                                 |
| [110] | 2022 | Vietnam   | 2,6   | 2003-21 | rice        |   | 1 |   |                       |                                                 |
| [111] | 2011 | India     | 5     | 2003-11 | all         |   | 1 |   |                       |                                                 |
| [112] | 2018 | India     | 1,7   | 2003-16 |             |   | 1 | 1 |                       |                                                 |
| [113] | 2006 | India     | 8     | 2001    | all         |   | 1 |   |                       |                                                 |
| [114] | 2019 | India     | 1 / 2 | 2002-16 | all         | 1 |   |   |                       |                                                 |
| [115] | 2018 | China     | 8     | 0       |             |   |   |   | Landsat               |                                                 |
| [116] | 2020 | China     | 1 / 2 | 2003-17 | all         |   | 1 |   |                       |                                                 |
| [117] | 2018 | China     | 1,6   | 2003-15 | 1           |   | 1 |   |                       |                                                 |
| [118] | 2014 | India     | 1     | 2010    | rice, wheat |   |   |   | AWiFS, LIS-III (NDVI) | ground data from burned rice and wheat fields   |

|       |      |             |       |         |       |   |            |                   |
|-------|------|-------------|-------|---------|-------|---|------------|-------------------|
| [119] | 2006 | China       | 6     | 2000    |       |   |            | GBA2000<br>(SPOT) |
| [120] | 2020 | China       | 2,3,4 | 2015-18 |       | 1 | Himawari-8 |                   |
| [121] | 2019 | China       | 5     | 2015    |       | 1 |            |                   |
| [122] | 2021 | China       | 2     | 2001-18 |       | 1 |            |                   |
| [123] | 2012 | Ghana       | 1     | 1989-06 | all   |   | Landsat    |                   |
| [124] | 2019 | China       | 1,6   | 2014-16 |       | 1 |            |                   |
| [125] | 2016 | China       | 1,6   | 1997-13 | 1     |   |            |                   |
| [126] | 2017 | China       | 8     | -       |       | 1 |            |                   |
| [127] | 2018 | China/India | 1,7   | 2016    |       | 1 |            | Sentinel          |
| [128] | 2020 | China       | 1,6   | 2012-15 |       | 1 | Himawari-8 |                   |
| [129] | 2022 | China       | 1,7   | 2015-19 | 1     |   | Fire-CCI   |                   |
| [130] | 2021 | China       | 3     | 2003-18 |       | 1 |            |                   |
| [131] | 2021 | China       | 2     | 2012-19 |       | 1 |            |                   |
| [132] | 2012 | China       | 5     | 2008    | all   | 1 |            |                   |
| [133] | 2018 | China       |       | 2003-17 |       | 1 |            |                   |
| [134] | 2020 | China       | 8     | 2015    | wheat |   | Landsat    | GF-1 images (16m) |
| [135] | 2021 | China       | 1,7   | 2015    | wheat |   | Landsat    | Landsat           |
| [136] | 2022 | China       | 3     | 2015-16 |       | 1 |            |                   |

<sup>1</sup> main focus/foci of article: 1-area estimation, 2-spatial/temporal trends in burning, 3- policy effect: impact evaluation/correlation with policy, 4-/correlation with externalities (pollution, etc.), 5-pollution source/transport/tracing, 6-pollution/emissions estimate, 7-product assessment/comparison, 8-methods development, 9-policy recommendations.

<sup>2</sup> gbem = ground-based aerosol/emissions measures

#### articles

1. Acharya, P.; Sreeekesh, S.; Kulshrestha, U. GHG and aerosol emission from fire pixel during crop residue burning under rice and wheat cropping systems in North-West India. *Remote. Sens. Spat. Inf. Sci.* **2016**, *XLI-B2*, 753–760.
2. Adam, M.; Fragkos, K.; Solomos, S.; Belegante, L.; Andrei, S.; Talianu, C.; Marmureanu, L.; Antonescu, B.; Ene, D.; Nicolae, V.; et al. Methodology for Lidar Monitoring of Biomass Burning Smoke in Connection with the Land Cover. *Remote. Sens.* **2022**, *14*, 4734.
3. Badarinath, K.V.S.; Chand, T.R.K.; Prasad, V.K. Agriculture crop residue burning in the Indo-Gangetic Plains-A study using IRS-P6 AWiFS satellite data. *Curr. Sci.* **2006**, *91*, 1085–1089.
4. Badarinath, K.V.S.; Kharol, S.K.; Sharma, A.R. Long-range transport of aerosols from agriculture crop residue burning in Indo-Gangetic Plains-A study using LIDAR, ground measurements and satellite data. *J. Atmos. Sol.-Terr. Phys.* **2009**, *71*, 112–120.
5. Badarinath, K.V.S.; Kharol, S.K.; Sharma, A.R.; Prasad, V.K. Analysis of aerosol and carbon monoxide characteristics over Arabian Sea during crop residue burning period in the Indo-Gangetic Plains using multi-satellite remote sensing datasets. *J. Atmos. Sol.-Terr. Phys.* **2009**, *71*, 1267–1276.
6. Bai, B.; Zhao, H.M.; Zhang, S.M.; Zhang, X.L.; Du, Y.B. Can Neural Networks Forecast Open Field Burning of Crop Residue in Regions with Anthropogenic Management and Control? A Case Study in Northeastern China. *Remote. Sens.* **2021**, *13*, 3988.
7. Beig, G.; Sahu, S.K.; Singh, V.; Tickle, S.; Sobhana, S.B.; Gargeva, P.; Ramakrishna, K.; Rathod, A.; Murthy, B.S. Objective evaluation of stubble emission of North India and quantifying its impact on air quality of Delhi. *Sci. Total. Environ.* **2020**, *709*, 136126.
8. Bilal, M.; Ali, M.A.; Nichol, J.E.; Bleiweiss, M.P.; de Leeuw, G.; Mhawish, A.; Shi, Y.; Mazhar, U.; Mehmood, T.; Kim, J. AEROSol generic classification using a novel Satellite remote sensing Approach (AEROSA). *Front. Environ. Sci.* **2022**, *10*, 981522.

9. Borgohain, A.; Gogoi, M.; Barman, N.; Kundu, A.; Banik, T.; Kundu, S.S.; Bhuyan, P.K.; Aggarwal, S.P. Impact of Biomass Burning on Black Carbon and NO<sub>2</sub> Over North Eastern Region of India Using Multi-satellite Observations. *J. Indian Soc. Remote Sens.* **2023**, *51*, 1605–1617.
10. Bray, C.D.; Battye, W.H.; Aneja, V.P. The role of biomass burning agricultural emissions in the Indo-Gangetic Plains on the air quality in New Delhi, India. *Atmospheric Environ.* **2019**, *218*, 116983.
11. Chakrabarti, S.; Khan, M. T. K.; Avinash Roy, D.; Scott, S. P. Risk of acute respiratory infection from crop burning in India: Estimating disease burden and economic welfare from satellite and national health survey data for 250000 persons (vol 48, pg. 1113, 2019). *Int. J. Epidemiol.* **2020**, *49*, 710–711.
12. Chang, D.; Song, Y. Estimates of biomass burning emissions in tropical Asia based on satellite-derived data. *Atmos. Chem. Phys.* **2010**, *10*, 2335–2351.
13. Chang, C.H.; Liu, C.C.; Tseng, P.Y. Emissions Inventory for Rice Straw Open Burning in Taiwan Based on Burned Area Classification and Mapping Using Formosat-2 Satellite Imagery. *Aerosol Air Qual. Res.* **2013**, *13*, 474–487.
14. Chauhan, A.; Singh, R.P. Poor air quality and dense haze/smog during 2016 in the indo-gangetic plains associated with the crop residue burning and Diwali festival. In Proceedings of the IEEE International Geoscience & Remote Sensing Symposium, Fort Worth, TX, USA, 23–28 July 2017.
15. Chauhan, A.; Singh, R.P.; Matsumi, Y.; Hayashida, S.; Nakayama, T.; Gupta, S.K.; Shukla, D.P.; Variability of the particulate matter concentration in the Northern parts of India using low-cost sensors. In Proceedings of the IEEE International Geoscience and Remote Sensing Symposium (IGARSS), Kuala Lumpur, Malaysia, 17–22 July 2022.
16. Chawala, P.; Sandhu, H.A.S. Stubble burn area estimation and its impact on ambient air quality of Patiala & Ludhiana district, Punjab, India. *Heliyon* **2020**, *6*, e03095.
17. Chen, W.W.; Li, J.W.; Bao, Q.Y.; Gao, Z.T.; Cheng, T.H.; Yu, Y. Evaluation of Straw Open Burning Prohibition Effect on Provincial Air Quality during October and November 2018 in Jilin Province. *Atmosphere* **2019**, *10*, 375.
18. Chen, Y.P.; Lara, M.J.; Hu, F.S. A robust visible near-infrared index for fire severity mapping in Arctic tundra ecosystems. *ISPRS J. Photogramm. Remote Sens.* **2020**, *159*, 101–113.
19. Chen, J.X.; Li, R.; Tao, M. H.; Wang, L. L.; Lin, C. Q.; Wang, J.; Wang, L. C.; Wang, Y.; Chen, L. F. Overview of the performance of satellite fire products in China: Uncertainties and challenges. *Atmos. Environ.* **2022**, *268*, 118838.
20. Cherian, R.; Venkataraman, C.; Kumar, A.; Sarin, M.M.; Sudheer, A.K.; Ramachandran, S. Source identification of aerosols influencing atmospheric extinction: Integrating PMF and PSCF with emission inventories and satellite observations. *J. Geophys. Res.-Atmos.* **2010**, *115*. <https://doi.org/10.1029/2009JD012975>.
21. Chhapariya, K.; Kumar, A.; Upadhyay, P. A fuzzy machine learning approach for identification of paddy stubble burnt fields. *Spat. Inf. Res.* **2021**, *29*, 319–329.
22. Cracknell, A.P.; Saradjian, M.R. Monitoring of straw burning in the UK using AVHRR data-Summer 1995. *Int. J. Remote Sens.* **1996**, *17*, 2463–2466.
23. Das, P.; Behera, M.D.; Abhilash, P.C. A rapid assessment of stubble burning and air pollutants from satellite observations. *Trop. Ecol.* **2023**, 1–6. <https://doi.org/10.1007/s42965-022-00291-5>.
24. Deshpande, M.V.; Pillai, D.; Jain, M. Agricultural burned area detection using an integrated approach utilizing multi spectral instrument based fire and vegetation indices from Sentinel-2 satellite. *Methodsx* **2022**, *9*, 101741.
25. Deshpande, M.V.; Pillai, D.; Jain, M. Detecting and quantifying residue burning in smallholder systems: An integrated approach using Sentinel-2 data. *Int. J. Appl. Earth Obs. Geoinf.* **2022**, *108*, 102761.
26. Dong, Y.; Gu, X.; Yu, T.; Wang, Z. The agricultural residues burning monitoring based on. EOS-Terra/MODIS data. In *International Conference on Information Technology and Environmental System Science*; Henan Polytechnic University: Jiaozuo, China, 2008.
27. Fu, Y.; Gao, H.; Liao, H.; Tian, X.J. Spatiotemporal Variations and Uncertainty in Crop Residue Burning Emissions over North China Plain: Implication for Atmospheric CO<sub>2</sub> Simulation. *Remote Sens.* **2021**, *13*, 3880.
28. Guo, J.P.; Zhang, X.Y.; Cao, C.X.; Che, H.Z.; Liu, H.L.; Monitoring haze episodes over the Yellow Sea by combining multisensor measurements. *Int. J. Remote Sens.* **2010**, *31*, 4743–4755.
29. Hall, J.V.; Loboda, T.V.; Giglio, L.; McCarty, G.W. A MODIS-based burned area assessment for Russian croplands: Mapping requirements and challenges. *Remote Sens. Environ.* **2016**, *184*, 506–521.
30. Hall, J.V.; Zibitsev, S. V.; Giglio, L.; Skakun, S.; Myroniuk, V.; Zhuravel, O.; Goldammer, J. G.; Kussul, N. Environmental and political implications of underestimated cropland burning in Ukraine. *Environ. Res. Lett.* **2021**, *16*, 064019.
31. Hall, J.V.; Argueta, F.; Giglio, L. Validation of MCD64A1 and FireCCI51 cropland burned area mapping in Ukraine. *Int. J. Appl. Earth Obs. Geoinf.* **2021**, *102*, 102443.
32. Hao, W.M.; Urbanski, S.P.; Nordgren, B.; Petkov, A. Daily Fire Occurrence in Ukraine from 2002 to 2008. In *Advanced Research Workshop on Using Satellite and In Situ Data to Improve Sustainability*; Springer: Kyiv, Ukraine, 2009.

33. He, G.J.; Liu, T.; Zhou, M.G. Straw burning, PM<sub>2.5</sub>, and death: Evidence from China. *J. Dev. Econ.* **2020**, *145*, 102468.
34. Hong, R.; Wang, X.J.; Fang, Y.; Wang, H.; Wang, C.P.; Wang, H.Q. Yolo-Light: Remote Straw-Burning Smoke Detection Based on Depthwise Separable Convolution and Channel Attention Mechanisms. *Appl. Sci.* **2023**, *13*, 5690.
35. Hong, X.H.; Zhang, C.X.; Tian, Y.; Wu, H.Y.; Zhu, Y.Z.; Liu, C. Quantification and evaluation of atmospheric emissions from crop residue burning constrained by satellite observations in China during 2016–2020. *Sci. Total. Environ.* **2023**, *865*, 161237.
36. Hou, L.L.; Chen, X. G.; Kuhn, L. N.; Huang, J. K. The effectiveness of regulations and technologies on sustainable use of crop residue in Northeast China. *Energy Econ.* **2019**, *81*, 519–527.
37. Irfan, M.; Riaz, M.; Arif, M.S.; Shahzad, S.M.; Hussain, S.; Akhtar, M.J.; van den Berg, L.; Abbas, F. Spatial distribution of pollutant emissions from crop residue burning in the Punjab and Sindh provinces of Pakistan: Uncertainties and challenges. *Environ. Sci. Pollut. Res.* **2015**, *22*, 16475–16491.
38. Jethva, H. Assessing predictability of post-monsoon crop residue fires in Northwestern India. *Front. Earth Sci.* **2022**, *10*, 2473.
39. Jethva, H.; Chand, D.; Torres, O.; Gupta, P.; Lyapustin, A.; Patadia, F. Agricultural Burning and Air Quality over Northern India: A Synergistic Analysis using NASA's A-train Satellite Data and Ground Measurements. *Aerosol Air Qual. Res.* **2018**, *18*, 1756–1773.
40. Jethva, H.; Torres, O.; Field, R.D.; Lyapustin, A.; Gautam, R.; Kayetha, V. Connecting Crop Productivity, Residue Fires, and Air Quality over Northern India. *Sci. Rep.* **2019**, *9*, 16594.
41. Jha, A.; Ranjan, R.; Nain, A.S.; Sharma, R.K.; Meena, R.P. Assessment of paddy residue burning through satellite remote sensing in Karnal, Haryana. *J. Agrometeorol.* **2019**, *21*, 113–119.
42. Jin, Q.F.; Ma, X.Q.; Wang, G.Y.; Yang, X.J.; Guo, F.T. Dynamics of major air pollutants from crop residue burning in mainland China, 2000–2014. *J. Environ. Sci.* **2018**, *70*, 190–205.
43. Junpen, A.; Pansuk, J.; Kamnoet, O.; Cheewaphongphan, P.; Garivait, S. Emission of Air Pollutants from Rice Residue Open Burning in Thailand, 2018. *Atmosphere* **2018**, *9*, 449.
44. Kalluri, R.O.R.; Zhang, X.Y.; Bi, L.; Zhao, J.Y.; Yu, L.; Kotalo, R.G. Carbonaceous aerosol emission reduction over Shandong province and the impact of air pollution control as observed from synthetic satellite data. *Atmos. Environ.* **2020**, *222*, 117150.
45. Kant, Y.; Chauhan, P.; Natwariya, A.; Kannaujiya, S.; Mitra, D. Long term influence of groundwater preservation policy on stubble burning and air pollution over North-West India. *Sci. Rep.* **2022**, *12*, 2090.
46. Kariyathan, T.; Pillai, D.; Elias, E.; Mathew, T.A. On deriving influences of upwind agricultural and anthropogenic emissions on greenhouse gas concentrations and air quality over Delhi in India: A stochastic Lagrangian footprint approach. *J. Earth Syst. Sci.* **2020**, *129*, 196.
47. Kaskaoutis, D.G.; Kumar, S.; Sharma, D.; Singh, R.P.; Kharol, S.K.; Sharma, M.; Singh, A.K.; Singh, S.; Singh, A.; Singh, D. Effects of crop residue burning on aerosol properties, plume characteristics, and long-range transport over northern India. *J. Geophys. Res.-Atmos.* **2014**, *119*, 5424–5444.
48. Khanal, S.; Pokhrel, R.P.; Pokharel, B.; Becker, S.; Giri, B.; Adhikari, L.; LaPlante, M.D. An episode of transboundary air pollution in the central Himalayas during agricultural residue burning season in North India. *Atmospheric Pollut. Res.* **2021**, *13*, 101270.
49. Kharol, S.K.; Badarinath, K.V.S.; Sharma, A.R.; Mahalakshmi, D.V.; Singh, D.; Prasad, V.K. Black carbon aerosol variations over Patiala city, Punjab, India—A study during agriculture crop residue burning period using ground measurements and satellite data. *J. Atmos. Sol.-Terr. Phys.* **2012**, *84–85*, 45–51.
50. Kumar, S.; Ghosh, S.K.; Pateriya, B. Spatio-temporal shift in fire activity in the Indo-Gangetic region. *Geocarto Int.* **2022**, 1–6. <https://doi.org/10.1080/10106049.2022.2144469>.
51. Kumar, A.; Hakkim, H.; Sinha, B.; Sinha, V. Gridded 1 km × 1 km emission inventory for paddy stubble burning emissions over north-west India constrained by measured emission factors of 77 VOCs and district-wise crop yield data. *Sci. Total Environ.* **2021**, *789*, 148064.
52. Kumar, P.; Rajpoot, S.K.; Jain, S.; Saxena, S.; Neetu; Ray, S.S. Monitoring of rice crop in Punjab and Haryana with respect to residue burning. *Int. Arch. Photogramm. Remote Sens. Spatial Inf. Sci.* **2019**, *XLII-3/W6*, 31–36.
53. Kumari, S.; Lakhani, A.; Kumari, K.M. Transport of aerosols and trace gases during dust and crop-residue burning events in Indo-Gangetic Plain: Influence on surface ozone levels over downwind region. *Atmospheric Environ.* **2020**, *241*, 117829.
54. Lakshmi, N.B.; Resmi, E.A.; Padmalal, D. Assessment of PM<sub>2.5</sub> using satellite lidar observations: Effect of bio-mass burning emissions over India. *Sci. Total. Environ.* **2022**, *833*, 155215.
55. Lasko, K.; Vadrevu, K.P.; Tran, V.T.; Ellicott, E.; Nguyen, T.T.N.; Bui, H.Q.; Justice, C. Satellites may underestimate rice residue and associated burning emissions in Vietnam. *Environ. Res. Lett.* **2017**, *12*, 085006.



56. Lasko, K.; Vadrevu, K. Improved rice residue burning emissions estimates: Accounting for practice-specific emission factors in air pollution assessments of Vietnam. *Environ. Pollut.* **2018**, *236*, 795–806.
57. Le, H.A.; Phuong, M.; Linh, L.T. Emission inventories of rice straw open burning in the Red River Delta of Vietnam: Evaluation of the potential of satellite data. *Environ. Pollut.* **2020**, *260*, 113972.
58. Le, H.A.; Khoi, N.Q.; Mallick, J. Integrated emission inventory and modelling to assess the distribution of particulate matters from rice straw open burning in Hanoi, Vietnam. *Atmospheric Pollut. Res.* **2022**, *13*, 101416.
59. Lee, J.J.; Lee, J.B.; Kim, O.; Heo, G.; Lee, H.; Lee, D.; Kim, D.G.; Lee, S.D. Crop Residue Burning in Northeast China and Its Impact on PM<sub>2.5</sub> Concentrations in South Korea. *Atmosphere* **2021**, *12*, 1212.
60. Li, J.; Bo, Y.; Xie, S.D. Estimating emissions from crop residue open burning in China based on statistics and MODIS fire products. *J. Environ. Sci.* **2016**, *44*, 158–170.
61. Li, R.; He, X.J.; Wang, H.; Wang, Y.; Zhang, M.G.; Mei, X.; Zhang, F.; Chen, L.F. Estimating Emissions from Crop Residue Open Burning in Central China from 2012 to 2020 Using Statistical Models Combined with Satellite Observations. *Remote. Sens.* **2022**, *14*, 3682.
62. Liu, T.; Marlier, M. E.; Karambelas, A.; Jain, M.; Singh, S.; Singh, M. K.; Gautam, R.; DeFries, R. S. Missing emissions from post-monsoon agricultural fires in northwestern India: Regional limitations of MODIS burned area and active fire products. *Environ. Res. Commun.* **2019**, *1*, 011007.
63. Liu, C.C.; Tseng, P.Y.; Chen, C.Y. The application of FORMOSAT-2 high-temporal-and high-spatial resolution imagery for monitoring open straw burning and carbon emission detection. *Nat. Hazards Earth Syst. Sci.* **2013**, *13*, 575–582.
64. Liu, M.X.; Song, Y.; Yao, H.; Kang, Y.N.; Li, M.M.; Huang, X.; Hu, M. Estimating emissions from agricultural fires in the North China Plain based on MODIS fire radiative power. *Atmos. Environ.* **2015**, *112*, 326–334.
65. Liu, T.; Mickley, L.J.; Patel, P.N.; Gautam, R.; Jain, M.; Singh, S.; Balwinder, S.; DeFries, R.S.; Marlier, M. Cascading Delays in the Monsoon Rice Growing Season and Postmonsoon Agricultural Fires Likely Exacerbate Air Pollution in North India. *J. Geophys. Res. Atmos.* **2022**, *127*, e2022JD036790.
66. Liu, T.; Mickley, L.J.; Singh, S.; Jain, M.; DeFries, R.S.; Marlier, M.E. Crop residue burning practices across north India inferred from household survey data: Bridging gaps in satellite observations. *Atmos. Environ. X* **2020**, *8*, 100091.
67. Liu, T.; He, G.J.; Lau, A.K.H. Statistical evidence on the impact of agricultural straw burning on urban air quality in China. *Sci. Total Environ.* **2020**, *711*, 134633.
68. Ma, M.L.; Bai, K.X.; Qiao, F.X.; Shi, R.H.; Gao, W. Quantifying impacts of crop residue burning in the North China Plain on summertime tropospheric ozone over East Asia. *Atmos. Environ.* **2018**, *194*, 14–30.
69. Maurya, N.K.; Pandey, P.C.; Sarkar, S.; Kumar, R.; Srivastava, P.K. Spatio-Temporal Monitoring of Atmospheric Pollutants Using Earth Observation Sentinel 5P TROPOMI Data: Impact of Stubble Burning a Case Study. *ISPRS Int. J. Geo-Inf.* **2022**, *11*, 301.
70. McCarty, J.L.; Justice, C.O.; Korontzi, S. Agricultural burning in the Southeastern United States detected by MODIS. *Remote Sens. Environ.* **2007**, *108*, 151–162.
71. McCarty, J.L.; T. Loboda, and S. Trigg, A hybrid remote sensing approach to quantifying crop residue burning in the United States. *Appl. Eng. Agric.* **2008**, *24*, 515–527.
72. McCarty, J.L.; Ellicott, E.A.; Romanenkov, V.; Rukhovich, D.; Koroleva, P. Multi-year black carbon emissions from cropland burning in the Russian Federation. *Atmos. Environ.* **2012**, *63*, 223–238.
73. Mehmood, K.; Wu, Y.J.; Wang, L.Q.; Yu, S.C.; Li, P.F.; Chen, X.; Li, Z.; Zhang, Y.B.; Li, M.Y.; Liu, W.P.; et al. Relative effects of open biomass burning and open crop straw burning on haze formation over central and eastern China: Modeling study driven by constrained emissions. *Atmos. Chem. Phys.* **2020**, *20*, 2419–2443.
74. Montes, C.; Sapkota, T.; Singh, B. Seasonal patterns in rice and wheat residue burning and surface PM<sub>2.5</sub> concentration in northern India. *Atmos. Environ. X* **2022**, *13*, 100154.
75. Nian, Y.W. Incentives, penalties, and rural air pollution: Evidence from satellite data. *J. Dev. Econ.* **2023**, *161*, 103049.
76. Nowell, H.K.; Wirks, C.; Martin, M.V.; van Donkelaar, A.; Martin, R.V.; Uejio, C.K.; Holmes, C.D. Impacts of Sugarcane Fires on Air Quality and Public Health in South Florida. *Environ. Health Perspect.* **2022**, *130*, 87004.
77. Nyasulu, M.; Haque, M.M.; Kumar, K.R.; Banda, N.; Ayugi, B.; Uddin, M.J. Temporal patterns of remote-sensed tropospheric carbon dioxide and methane over an urban site in Malawi, Southeast Africa: Implications for climate effects. *Atmos. Pollut. Res.* **2021**, *12*, 125–135.
78. Pawar, H.; Sinha, B. Residential heating emissions (can) exceed paddy-residue burning emissions in rural northwest India. *Atmos. Environ.* **2021**, *269*, 118846.

79. Perillo, L.I.; Bordonal, R.D.; de Figueiredo, E.B.; Moitinho, M.R.; Aguiar, D.A.; Rudorff, B.F.T.; Panosso, A.R.; La Scala, N. Avoiding burning practice and its consequences on the greenhouse gas emission in sugarcane areas southern Brazil. *Environ. Sci. Pollut. Res.* **2022**, *29*, 719–730.
80. Pouliot, G.; Rao, V.; McCarty, J.L.; Soja, A. Development of the crop residue and rangeland burning in the 2014 National Emissions Inventory using information from multiple sources. *J. Air Waste Manag. Assoc.* **2017**, *67*, 613–622.
81. Prabhu, V.; Soni, A.; Madhwal, S.; Gupta, A.; Sundriyal, S.; Shridhar, V.; Sreekanth, V.; Mahapatra, P.S. Black carbon and biomass burning associated high pollution episodes observed at Doon valley in the foothills of the Himalayas. *Atmos. Res.* **2020**, *243*, 105001.
82. Prasad, V.K.; Kant, Y.; Gupta, P.K.; Elvidge, C.; Badarinath, K.V.S. Biomass burning and related trace gas emissions from tropical dry deciduous forests of India: A study using DMSP-OLS data and ground-based measurements. *Int. J. Remote Sens.* **2002**, *23*, 2837–2851.
83. Punia, M.; Nautiyal, V.P.; Kant, Y. Identifying biomass burned patches of agriculture residue using satellite remote sensing data. *Curr. Sci.* **2008**, *94*, 1185–1190.
84. Rasul, A.; Ibrahim, G.R.F.; Hameed, H.M.; Tansey, K. A trend of increasing burned areas in Iraq from 2001 to 2019. *Environ. Dev. Sustain.* **2021**, *23*, 5739–5755.
85. Rahman, M.H.; Singh, N.; Kundu, S.; Datta, A. Potential areas of crop residue burning contributing to hazardous air pollution in Delhi during the post-monsoon season. *J. Environ. Qual.* **2022**, *51*, 181–192.
86. Rios, B.; Raga, G.B. Smoke emissions from agricultural fires in Mexico and Central America. *J. Appl. Remote. Sens.* **2019**, *13*, 036509.
87. Li, R.M.; et al. Inventory of Atmospheric Pollutant Emissions from Burning of Crop Residues in China Based on Satellite-retrieved Farmland Data. *Chin. Geogr. Sci.* **2020**, *30*, 266–278.
88. Sahu, S.K.; Mangaraj, P.; Beig, G.; Samal, A.; Pradhan, C.; Dash, S.; Tyagi, B. Quantifying the high resolution seasonal emission of air pollutants from crop residue burning in India. *Environ. Pollut.* **2021**, *286*, 117165.
89. Sarkar, C.; Kumar, V.; Sinha, V. Massive emissions of carcinogenic benzenoids from paddy residue burning in North India. *Curr. Sci.* **2013**, *104*, 1703–1709.
90. Sarkar, S.; Singh, R.P.; Chauhan, A. Crop Residue Burning in Northern India: Increasing Threat to Greater India. *J. Geophys. Res.-Atmos.* **2018**, *123*, 6920–6934.
91. Shahid, M.Z.; Shahid, I.; Zahid, M. Inter-annual variability and distribution of aerosols during winters and aerosol optical thickness over Northeastern Pakistan. *Int. J. Environ. Sci. Technol.* **2022**, *19*, 875–888.
92. Shaik, D.S.; Kant, Y.; Mitra, D.; Singh, A.; Chandola, H.C.; Sateesh, M.; Babu, S.S.; Chauhan, P. Impact of biomass burning on regional aerosol optical properties: A case study over northern India. *J. Environ. Manag.* **2019**, *244*, 328–343.
93. Shen, Y.L.; Jiang, C.M.; Chan, K.L.; Hu, C.L.; Yao, L. Estimation of Field-Level NO<sub>x</sub> Emissions from Crop Residue Burning Using Remote Sensing Data: A Case Study in Hubei, China. *Remote. Sens.* **2021**, *13*, 404.
94. Shi, T.T.; Liu, Y.Q.; Zhang, L.B.; Hao, L.; Gao, Z.Q. Burning in agricultural landscapes: An emerging natural and human issue in China. *Landsc. Ecol.* **2014**, *29*, 1785–1798.
95. Shi, S.Y.; Ma, Y.J.; Bao, F.W.; Mumtaz, F. A Satellite Data Based Detailed Study of the Aerosol Emitted from Open Biomass Burning in Northeast China. *Atmosphere* **2021**, *12*, 1700.
96. Shi, Y.S.; Shi, Y.S.; Gong, S.Y.; Zang, S.Y.; Zhao, Y.; Wang, W.; Lv, Z.H.; Matsunaga, T.; Yamaguchi, Y.; Bai, Y.B. High-resolution and multi-year estimation of emissions from open biomass burning in Northeast China during 2001–2017. *J. Clean. Prod.* **2021**, *310*, 127496.
97. Shon, Z.H.; Long-term variations in PM<sub>2.5</sub> emission from open biomass burning in Northeast Asia derived from satellite-derived data for 2000–2013. *Atmos. Environ.* **2015**, *107*, 342–350.
98. Singh, C.P. and S. Panigrahy, Characterisation of Residue Burning from Agricultural System in India using Space Based Observations. *J. Indian Soc. Remote Sens.* **2011**, *39*, 423–429.
99. Singh, A.; Kumar, A. Identification of Paddy Stubble Burnt Activities Using Temporal Class-Based Sensor-Independent Indices Database: Modified Possibilistic Fuzzy Classification Approach. *J. Indian Soc. Remote Sens.* **2020**, *48*, 423–430.
100. Singh, T.; Biswal, A.; Mor, S.; Ravindra, K.; Singh, V.; Mor, S. A high-resolution emission inventory of air pollutants from primary crop residue burning over Northern India based on VIIRS thermal anomalies. *Environ. Pollut.* **2020**, *266*, 115132.
101. Singh, D.; Kundu, N.; Ghosh, S. Mapping rice residues burning and generated pollutants using Sentinel-2 data over northern part of India. *Remote. Sens. Appl. Soc. Environ.* **2021**, *22*, 100486.

102. Singha, M.; Dong, J. W.; Ge, Q. S.; Metternicht, G.; Sarmah, S.; Zhang, G. L.; Doughty, R.; Lele, S.; Biradar, C.; Zhou, S.; et al. Satellite evidence on the trade-offs of the food-water-air quality nexus over the breadbasket of India. *Glob. Environ. Change-Hum. Policy Dimens.* **2021**, *71*, 102394.
103. Smith, R.; Adams, M.; Maier, S.; Craig, R.; Kristina, A.; Maling, I. Estimating the area of stubble burning from the number of active fires detected by satellite. *Remote Sens. Environ.* **2007**, *109*, 95–106.
104. Stavrakou, T.; Muller, J. F.; Bauwens, M.; De Smedt, I.; Lerot, C.; Van Roozendael, M.; Coheur, P. F.; Clerbaux, C.; Boersma, K. F.; van der A, R.; Song, Y. Substantial Underestimation of Post-Harvest Burning Emissions in the North China Plain Revealed by Multi-Species Space Observations. *Sci. Rep.* **2016**, *6*, 32307.
105. Su, B.; Wu, D.Y.; Zhang, M.; Bilal, M.; Li, Y.Y.; Li, B.L.; Atique, L.; Zhang, Z.Y.; Howari, F.M. Spatio-Temporal Characteristics of PM<sub>2.5</sub>, PM<sub>10</sub>, and AOD over the Central Line Project of China's South-North Water Diversion in Henan Province (China). *Atmosphere* **2021**, *12*, 225.
106. Sun, L.; Yang, L.; Xia, X.A.; Wang, D.D.; Zhang, T.N. Climatological Aspects of Active Fires in Northeastern China and Their Relationship to Land Cover. *Remote. Sens.* **2022**, *14*, 2316.
107. Tariq, S.; ul-Haq, Z.; Ali, M. Analysis of optical and physical properties of aerosols during crop residue burning event of October 2010 over Lahore, Pakistan. *Atmos. Pollut. Res.* **2015**, *6*, 969–978.
108. Tariq, S.; ul-Haq, Z.; Ali, M. Ali, Satellite and ground-based remote sensing of aerosols during intense haze event of October 2013 over Lahore, Pakistan. *Asia-Pac. J. Atmos. Sci.* **2016**, *52*, 25–33.
109. Thumaty, K.C.; Rodda, S. R.; Singhal, J.; Gopalakrishnan, R.; Jha, C. S.; Parsi, G. D.; Dadhwal, V. K. Spatio-temporal characterization of agriculture residue burning in Punjab and Haryana, India, using MODIS and Suomi NPP VIIRS data. *Curr. Sci.* **2015**, *109*, 1850–1855.
110. Tran, H.; Chauhan, A.; Singh, R.P. Influence of crop burning on air pollution in Vietnam. In Proceedings of the IEEE International Geoscience and Remote Sensing Symposium (IGARSS), Kuala Lumpur, Malaysia, 17–22 July 2022.
111. Vadrevu, K.P.; Ellicott, E.; Badarinath, K.V.S.; Vermote, E. MODIS derived fire characteristics and aerosol optical depth variations during the agricultural residue burning season, north India. *Environ. Pollut.* **2011**, *159*, 1560–1569.
112. Vadrevu, K.; Lasko, K. Intercomparison of MODIS AQUA and VIIRS I-Band Fires and Emissions in an Agricultural Landscape-Implications for Air Pollution Research. *Remote Sens.* **2018**, *10*, 978.
113. Venkataraman, C.; Habib, G.; Kadamba, D.; Shrivastava, M.; Leon, J.F.; Crouzille, B.; Boucher, O.; Streets, D.G. Emissions from open biomass burning in India: Integrating the inventory approach with high-resolution Moderate Resolution Imaging Spectroradiometer (MODIS) active-fire and land cover data. *Glob. Biogeochem. Cycles* **2006**, *20*. <https://doi.org/10.1029/2005GB002547>.
114. Verma, S.; Dar, J.A.; Malasiya, D.; Khare, P.K.; Dayanandan, S.; Khan, M.L. A MODIS-based spatiotemporal assessment of agricultural residue burning in Madhya Pradesh, India. *Ecol. Indic.* **2019**, *105*, 496–504.
115. Wang, S.D.; Baig, M.H.A.; Liu, S.H.; Wan, H.W.; Wu, T.X.; Yang, Y.Y. Estimating the area burned by agricultural fires from Landsat 8 Data using the Vegetation Difference Index and Burn Scar Index. *Int. J. Wildland Fire* **2018**, *27*, 217–227.
116. Wang, L.L.; Jin, X.; Wang, Q.L.; Mao, H.Q.; Liu, Q.Y.; Weng, G.Q.; Wang, Y.S. Spatial and temporal variability of open biomass burning in Northeast China from 2003 to 2017. *Atmos. Ocean. Sci. Lett.* **2020**, *13*, 240–247.
117. Wu, J.; Kong, S.F.; Wu, F.Q.; Cheng, Y.; Zheng, S.R.; Yan, Q.; Zheng, H.; Yang, G.W.; Zheng, M.M.; Liu, D.T.; et al. Estimating the open biomass burning emissions in central and eastern China from 2003 to 2015 based on satellite observation. *Atmos. Chem. Phys.* **2018**, *18*, 11623–11646.
118. Yadav, M.; Sharma, M.P.; Prawasi, R.; Khichi, R.; Kumar, P.; Mandal, V.P.; Salim, A.; Hooda, R.S. Estimation of Wheat/Rice Residue Burning Areas in Major Districts of Haryana, India, Using Remote Sensing Data. *J. Indian Soc. Remote Sens.* **2014**, *42*, 343–352.
119. Yan, X.Y.; T. Ohara, and H. Akimoto, Bottom-up estimate of biomass burning in mainland China. *Atmos. Environ.* **2006**, *40*, 5262–5273.
120. Yang, G.Y.; Zhao, H.M.; Tong, D.Q.; Xiu, A.J.; Zhang, X.L.; Gao, C. Impacts of post-harvest open biomass burning and burning ban policy on severe haze in the Northeastern China. *Sci. Total. Environ.* **2020**, *716*, 136517.
121. Yin, S.; Wang, X.F.; Zhang, X.R.; Zhang, Z.X.; Xiao, Y.; Tani, H.; Sun, Z.Y. Exploring the effects of crop residue burning on local haze pollution in Northeast China using ground and satellite data. *Atmos. Environ.* **2019**, *199*, 189–201.
122. Yin, S.; Guo, M.; Wang, X.F.; Yamamoto, H.; Ou, W. Spatiotemporal variation and distribution characteristics of crop residue burning in China from 2001 to 2018. *Environ. Pollut.* **2020**, *268*, 115849.
123. Yiran, G.A.B.; Kusimi, J.M.; Kufogbe, S.K. A synthesis of remote sensing and local knowledge approaches in land degradation assessment in the Bawku East District, Ghana. *Int. J. Appl. Earth Obs. Geoinf.* **2012**, *14*, 204–213.

124. Yu, M.M.; Yuan, X.L.; He, Q.Q.; Yu, Y.H.; Cao, K.; Zhang, W.T. Temporal-spatial analysis of crop residue burning in China and its impact on aerosol pollution. *Environ. Pollut.* **2019**, *245*, 616–626.
125. Zhang, L.B.; Liu, Y.Q.; Hao, L. Contributions of open crop straw burning emissions to PM<sub>2.5</sub> concentrations in China. *Environ. Res. Lett.* **2016**, *11*, 014014.
126. Zhang, T.R.; Wooster, M.J.; Xu, W.D. Approaches for synergistically exploiting VIIRS I- and M-Band data in regional active fire detection and FRP assessment: A demonstration with respect to agricultural residue burning in Eastern China. *Remote Sens. Environ.* **2017**, *198*, 407–424.
127. Zhang, T.R.; Wooster, M.J.; Xu, W.D. How Well Does the "Small Fire Boost" Methodology Used within the GFED4.1s Fire Emissions Database Represent the Timing, Location and Magnitude of Agricultural Burning? *Remote Sens.* **2018**, *10*, 823.
128. Zhang, T.R.; Wooster, M.J.; de Jong, M.C.; Xu, W.D. Trends in eastern China agricultural fire emissions derived from a combination of geostationary (Himawari) and polar (VIIRS) orbiter fire radiative power products. *Atmos. Chem. Phys.* **2020**, *20*, 10687–10705.
129. Zhang, S.M.; Zhao, H.; Wu, Z.; Tan, L. Comparing the Ability of Burned Area Products to Detect Crop Residue Burning in China. *Remote Sens.* **2022**, *14*, 693.
130. Zhou, Y.; Zhang, Y.Y.; Zhao, B.B.; Lang, J.L.; Xia, X.C.; Chen, D.S.; Cheng, S.Y. Estimating air pollutant emissions from crop residue open burning through a calculation of open burning proportion based on satellite-derived fire radiative energy. *Environ. Pollut.* **2021**, *286*, 117477.
131. Zhao, H.M.; Yang, G.Y.; Tong, D.Q.; Zhang, X.L.; Xiu, A.J.; Zhang, S.C. Interannual and Seasonal Variability of Greenhouse Gases and Aerosol Emissions from Biomass Burning in Northeastern China Constrained by Satellite Observations. *Remote Sens.* **2021**, *13*, 1005.
132. Zhu, B.; Su, J.F.; Kang, H.Q.; Cai, Y. The impact of crop residue burning on air quality over Yangtze River Delta, China: Observation and simulation. In Proceedings of the IEEE International Geoscience and Remote Sensing Symposium (IGARSS), Munich, Germany, 22–27 July 2012.
133. Zhuang, Y.; Li, R.Y.; Yang, H.; Chen, D.L.; Chen, Z.Y.; Gao, B.B.; He, B. Understanding Temporal and Spatial Distribution of Crop Residue Burning in China from 2003 to 2017 Using MODIS Data. *Remote Sens.* **2018**, *10*, 390.
134. Liu, S.F.; Wang, S.D.; Chi, T.H.; Wen, C.C.; Wu, T.X.; Wang, D.C. An improved combined vegetation difference index and burn scar index approach for mapping cropland burned areas using combined data from Landsat 8 multispectral and thermal infrared bands. *Int. J. Wildland Fire* **2020**, *29*, 499–512.
135. Liu, T.; Mickley, L.J.; Gautam, R.; Singh, M.K.; DeFries, R.S.; Marlier, M.E. Detection of delay in post-monsoon agricultural burning across Punjab, India: Potential drivers and consequences for air quality. *Environ. Res. Lett.* **2020**, *16*, 014014.
136. Wang, T.W.; Meng, K.; Fu, P.H.; Huang, W. Crop residual burning correlations with major air pollutants in mainland China. *Front. Environ. Sci.* **2022**, *10*, 1002610.
